# Supplementary material for: Cost-effectiveness analysis of human papillomavirus vaccination in South Africa accounting for human immunodeficiency virus prevalence
Source: Springer Nature journal article supplement (doi:10.1186/s12879-015-1295-z), 2015-12-01
Supplement: MOESM1 [file 9740588]

## Additional file 1 - Literature Review: natural history related to oncogenic HPV in HIV infected population in Africa or South Africa

### Supplementary Table 1: PICOS framework

The study question was formalised according to the PICOS framework (Population, Intervention, Comparison, Outcome and Study type) to capture studies reporting natural history related to oncogenic HPV in HIV infected population in Africa or South Africa.

|              |                                                                                        |
|--------------|----------------------------------------------------------------------------------------|
| Population   | HIV infected women in South Africa or subsaharan Africa or Africa                      |
| Intervention | None                                                                                   |
| Comparator   | None                                                                                   |
| Outcome      | Progression, regression rate, cervical cancer prevalence, incidence and mortality rate |
| Study design | No restriction                                                                         |

Database: Pubmed

Time span: 2000-2014/2/17

Language: English only

#### Search keywords

|    |                                                                                      |
|----|--------------------------------------------------------------------------------------|
| #1 | Human papillomavirus OR HPV OR cervix OR neoplasm                                    |
| #2 | Human immunodeficiency virus infection OR acquired immune deficiency syndrome OR HIV |
| #3 | progression OR regression OR prevalence OR incidence OR mortality                    |
| #4 | Africa OR South Africa OR subsaharan Africa                                          |
| #5 | #1 AND #2 AND #3 AND #4 AND #5                                                       |

Total number of hits 821

#### Exclusion criteria

- Not written in English
- Not a country of interest
- Not the study type of interest (e.g. case report, randomised controlled clinical trials),
- Non-human studies
- Men population
- Not numerical rate reported

*From:* Moher D, Liberati A, Tetzlaff J, Altman DG, The PRISMA Group (2009). Preferred Reporting Items for Systematic Reviews and Meta-Analyses: The PRISMA Statement. PLoS Med 6(6): e1000097. doi:10.1371/journal.pmed1000097

**For more information, visit [www.prisma-statement.org](http://www.prisma-statement.org)**

**Supplementary Figure 1: PRISMA 2009 Flow Diagram**

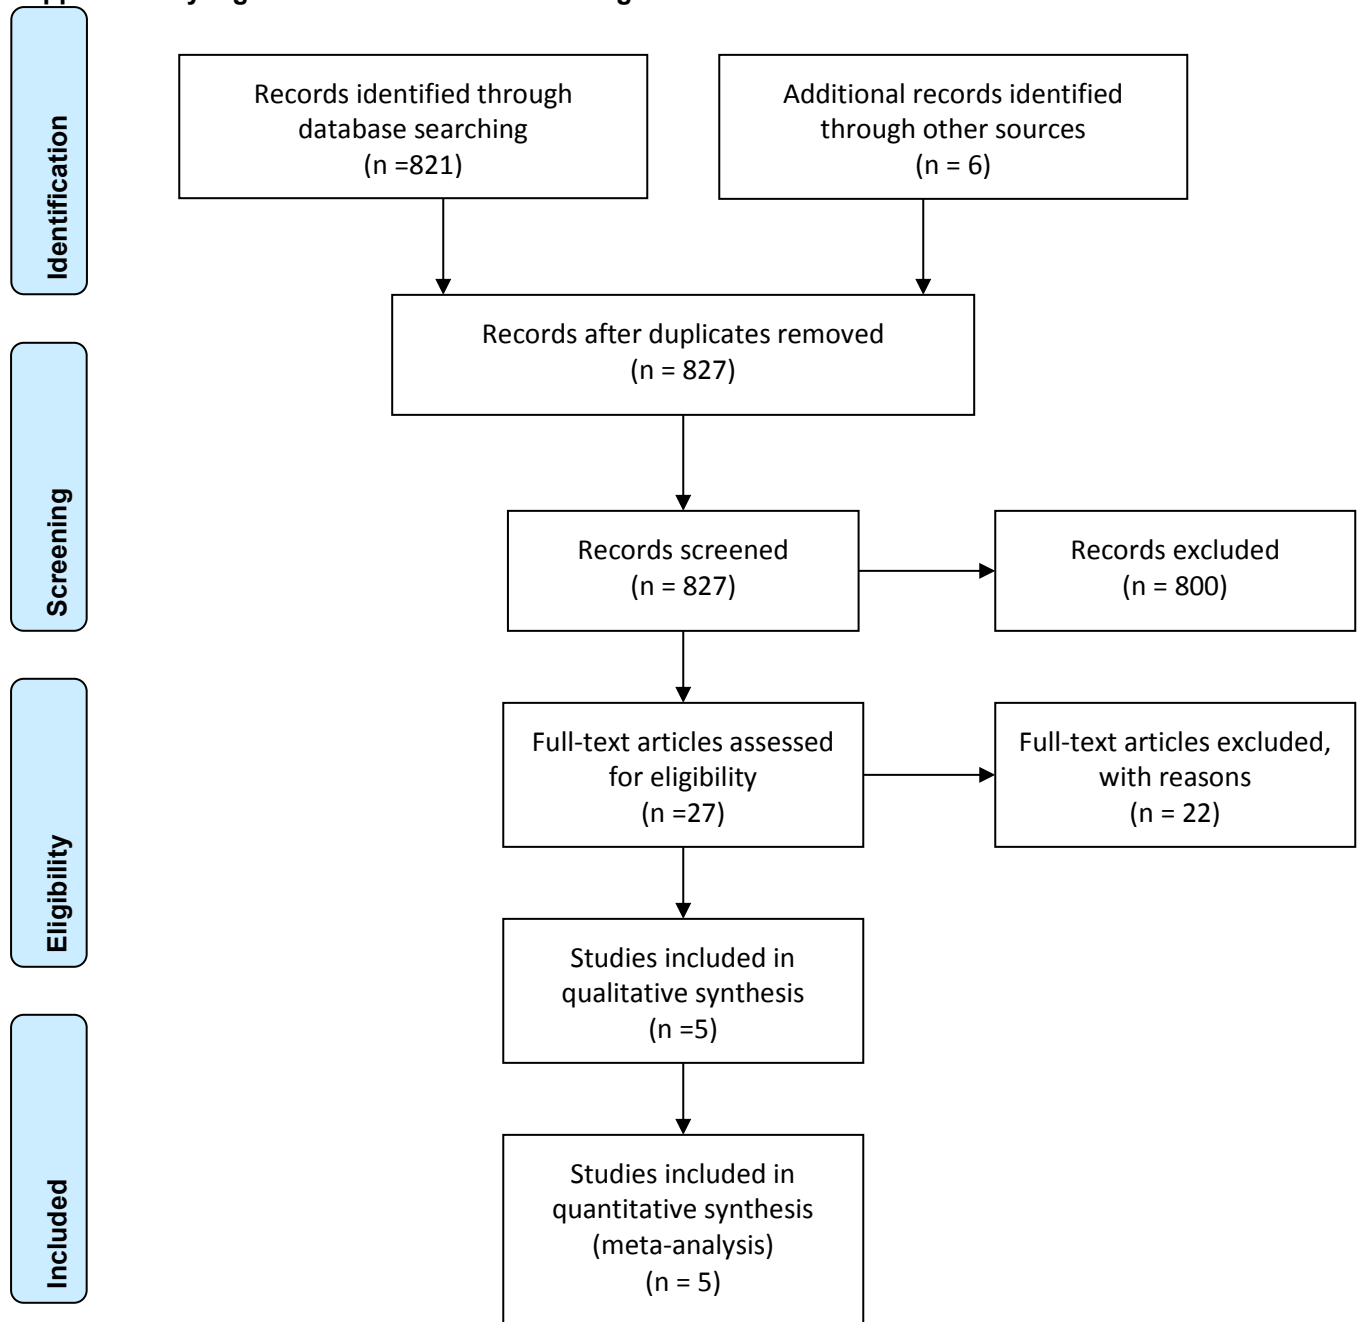

From: Moher D, Liberati A, Tetzlaff J, Altman DG, The PRISMA Group (2009). Preferred Reporting Items for Systematic Reviews and Meta-Analyses: The PRISMA Statement. PLoS Med 6(6): e1000097. doi:10.1371/journal.pmed1000097

For more information, visit [www.prisma-statement.org](http://www.prisma-statement.org)
