# Supplementary material for: Cost-effectiveness analysis of human papillomavirus vaccination in South Africa accounting for human immunodeficiency virus prevalence
Source: Springer Nature journal article supplement (doi:10.1186/s12879-015-1295-z), 2015-12-01
Supplement: MOESM2 [file 9740588]

## Additional file 2 – Resource use unit costs and cervical cancer treatment costs

**Supplementary Table 1: Unit costs**

| Items                                | Unit cost (ZAR) | Year | Cost adjustment<br>(Cost*CPI*Exchange rate)<br>(ZAR) | Source                                                                                           |
|--------------------------------------|-----------------|------|------------------------------------------------------|--------------------------------------------------------------------------------------------------|
| <b>Cost of visit</b>                 |                 |      |                                                      |                                                                                                  |
| Anaesthetist                         | 1 520.00        | 2013 | NA                                                   | UPFS 2013 [1]                                                                                    |
| Dermatologist                        | 183.00          | 2013 | NA                                                   | UPFS 2013 [1]                                                                                    |
| GP                                   | 79.00           | 2013 | NA                                                   | UPFS 2013 [1]                                                                                    |
| Gynaecologist                        | 183.00          | 2013 | NA                                                   | UPFS 2013 [1]                                                                                    |
| HIV physician                        | 183.00          | 2013 | NA                                                   | UPFS 2013 [1]                                                                                    |
| Infectious disease specialist        | 183.00          | 2013 | NA                                                   | UPFS 2013 [1]                                                                                    |
| Oncologist                           | 183.00          | 2013 | NA                                                   | UPFS 2013 [1]                                                                                    |
| Psychologist                         | 183.00          | 2013 | NA                                                   | UPFS 2013 [1]                                                                                    |
| Radiologist                          | 183.00          | 2013 | NA                                                   | UPFS 2013 [1]                                                                                    |
| <b>Cost of diagnostic procedures</b> |                 |      |                                                      |                                                                                                  |
| Chest X ray                          | 197.00          | 2013 | NA                                                   | UPFS 2013 Code DA0520 [2]                                                                        |
| HIV test                             | 47.80           | 2013 | NA                                                   | NHLS 2013 code 877 [3]                                                                           |
| HPV tests                            | 857.00          | 2013 | NA                                                   | NHLS 2013 code 3920 [3]                                                                          |
| Pap smears                           | 57.90           | 1999 | 57.90*1*2.2=125.00                                   | Goldie et al. [4]; CPI: Statistical office [5]                                                   |
| Pregnancy test                       | 73.50           | 2013 | NA                                                   | NHLS 2013 code 3692                                                                              |
| Repeat Pap smear                     | 57.90           | 1999 | 57.90*1*2.2=125.00                                   | Goldie et al. [4]                                                                                |
| Ultrasound                           | 799.00          | 2013 | NA                                                   | UPFS 2013 Code DA0530[2]                                                                         |
| <b>Hospitalisation cost</b>          |                 |      |                                                      |                                                                                                  |
| In-patient, normal room              | 1 384.00        | 2013 | NA                                                   | UPFS 2013[2]                                                                                     |
| In-patient, intensive care unit      | 3 499.00        | 2013 | NA                                                   | UPFS 2013[2]                                                                                     |
| Day care                             | 884.00          | 2013 | NA                                                   | UPFS 2013 [2]                                                                                    |
| <b>Treatment cost</b>                |                 |      |                                                      |                                                                                                  |
| Hysterectomy                         | INT\$ 1 582.70  | 2000 | INT\$1 582.7*3.12* 2.1=10 141.00                     | Goldie et al. [4]; Exchange rate (PPP) IMF [6]; CPI: Statistical office [5]                      |
| Laser treatment                      | INT\$ 378.60    | 2000 | INT\$378.60*3.12*2.1=2 426.00                        | Assumption: Same cost as LLETZ, Goldie et al. [4]; EX(PPP) IMF [6] ; CPI: Statistical office [5] |
| LLETZ                                | INT\$ 378.60    | 2000 | INT\$378.6*3.12*2.1=2 426.00                         | Goldie et al. [4]; EX(PPP) IMF [6] ; CPI: Statistical office [5]                                 |
| Colposcopies                         | 123.10          | 1999 | 123.1*2.2=226.00                                     | Goldie et al. [4]; CPI: Statistical office [5]                                                   |
| Conisation                           | 246.20          | 1999 | 246.2*2.2 =553.00                                    | Goldie et al. [4]; CPI: Statistical office [5]                                                   |
| Biopsy                               | 187.20          | 1999 | 187.2*2.2=405.00                                     | Goldie et al. [4]; CPI: Statistical office [5]                                                   |
| Cryotherapy                          | 652.70          | 1999 | 652.6*2.2=1 412.00                                   | Goldie et al. [4] ; CPI: Statistical office [5]                                                  |

CPI, consumer price index; EX, exchange rate; GP, general practitioner; HPV, human papillomavirus; HIV, human immunodeficiency; IMF, International Monetary Fund; INT\$, international dollar; LLETZ, large loop excision of the transformation zone; NA, not applicable; NHLS, National Health Laboratory Service; Pap, Papanicolaou smear test; PPP, purchasing power parity; UPFS, Uniform Patient Fee Schedule ; ZAR, South African Rand.

**Supplementary Table 2: Cervical cancer treatment costs**

| Items                                              | Unit cost (ZAR) | Year | Number of cycles | Source            |
|----------------------------------------------------|-----------------|------|------------------|-------------------|
| <b>Cost of radiotherapy</b>                        |                 |      |                  |                   |
| Planning facility fee                              | 1 291           | 2013 | 1                | UPFS 2013 [1]     |
| Planning professional fee                          | 553             | 2013 | 1                | UPFS 2013 [1]     |
| Radiation                                          | 17 025          | 2013 | 5                | UPFS 2013 [1]     |
| Radiation                                          | 7 295           | 2013 | 5                | UPFS 2013 [1]     |
| Remote afterloading                                | 4 167           | 2013 | 1                | UPFS 2013 [1]     |
| Remote afterloading                                | 9 779           | 2013 | 1                | UPFS 2013 [1]     |
| <b>Sum</b>                                         |                 |      |                  | <b>ZAR 40 110</b> |
| <b>Cost of chemotherapy</b>                        |                 |      |                  |                   |
| Facility fee                                       | 3 205           | 2013 | 5                | UPFS 2013 [1]     |
| Professional fee                                   | 6 470           | 2013 | 5                | UPFS 2013 [1]     |
| <b>Sum</b>                                         |                 |      |                  | <b>ZAR 9 675</b>  |
| <b>Cost of colostomy for rectovaginal fistulae</b> |                 |      |                  |                   |
| Consultation specialist                            | 183             | 2013 | NA               | UPFS 2013 [1]     |
| Anaesthetic                                        | 1 520           | 2013 | NA               | UPFS 2013 [1]     |
| Ward fee 5 days                                    | 3 660           | 2013 | NA               | UPFS 2013 [1]     |
| Major theatre procedure: facility fee              | 2 420           | 2013 | NA               | UPFS 2013 [1]     |
| Theatre procedure specialist                       | 391             | 2013 | NA               | UPFS 2013 [1]     |
| <b>Sum</b>                                         |                 |      |                  | <b>ZAR 8 174</b>  |

NA, not applicable; ZAR, South African Rand.

### Delphi panel

A two-round Delphi panel was held over the course of 2012 and 2013.

In the first round, 8 panellists were selected to participate into the Delphi panel, using a standardised questionnaire querying 4 domains:

- Section 1: the description of panelists' specific expertise
- Section 2: the medical management of patients undergoing a cervical screening in South Africa
- Section 3: the medical management of CIN1, CIN2 and CIN3 and cervical cancer treatment
- Section 4: the medical management for genital warts treatment

As we did not include genital warts into our analysis, we don't report the data collected on genital warts treatment.

The questionnaire is attached (see below Delphi panel questionnaire).

The 8 panellists were all gynaecology oncologists. The regions covered by the panelists are: Gauteng, Western Cape Metro east, Western Eastern Cape Namibia, entire KZN, Tshwane and Johannesburg.

Results on the number of patients seen per year by each expert and the number of patients seen per year for cervical cancer screening is reported in Supplementary Figure 1.

**Supplementary Figure 1: Number of patients in practice of experts**

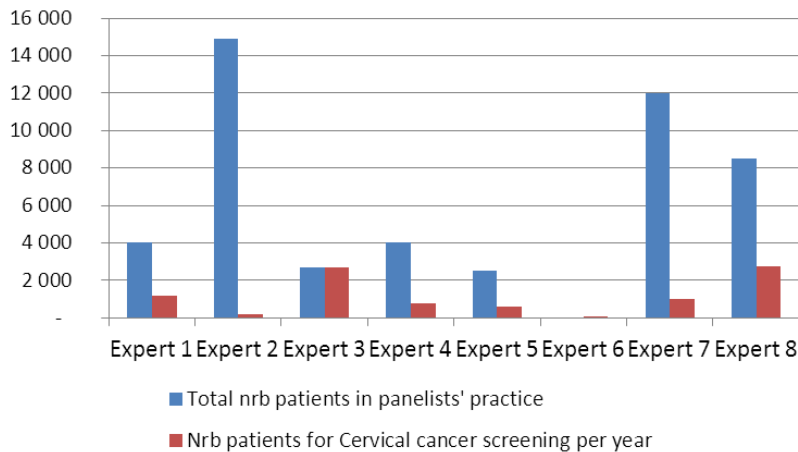

**Supplementary Figure 2: Number of patients seen per year for treatment of CIN and cervical cancer**

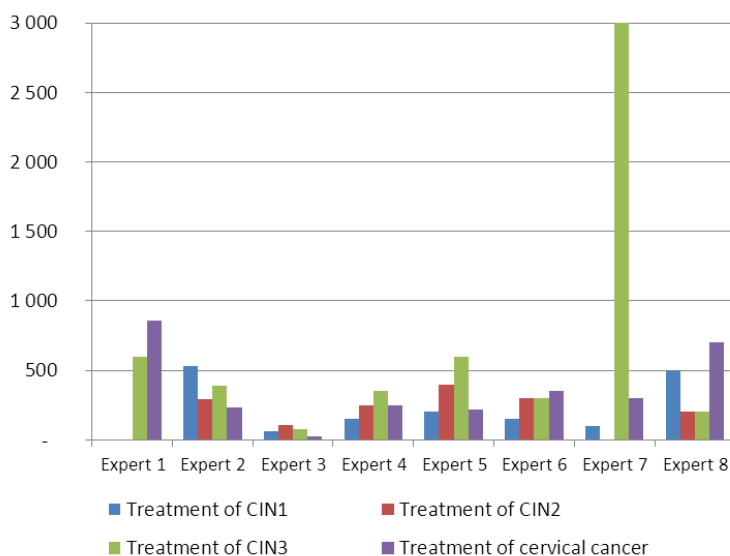

CIN 1/2/3, cervical intraepithelial neoplasia grade 1/2/3

**Supplementary Table 3: Resource and cost items for negative pap smear**

| Number of times consumed   | Resource                | Proportion of patients receiving service | Unit cost (ZAR) | Weighted cost (ZAR) |
|----------------------------|-------------------------|------------------------------------------|-----------------|---------------------|
| 1                          | Papanicolaou smear test | 100%                                     | 125.29          | 125.3               |
| 1                          | GP visit                | 50%                                      | 79              | 39.5                |
| 1                          | Gynaecologist visit     | 50%                                      | 183             | 91.5                |
| <b>Total weighted cost</b> |                         |                                          | <b>ZAR 256</b>  |                     |

GP, general practitioner; ZAR, South African Rand.

**Supplementary Table 4: Resource use and cost items for positive Pap smear**

| Number of times consumed   | Resource                 | Proportion of patients receiving service | Delphi panel results | Unit cost (ZAR) | Weighted cost (ZAR) |
|----------------------------|--------------------------|------------------------------------------|----------------------|-----------------|---------------------|
|                            | No additional procedure  | 22%                                      | Majority agreed      | 0.0             | 0                   |
| 2                          | Colposcopies             | 49%                                      | All Agreed           | 266.4           | 261.0               |
| 1                          | Colposcopies with biopsy | 30%                                      | All Agreed           | 671.5           | 201.4               |
| 1.2                        | Repeat Pap smears        | 43%                                      | All agreed           | 125.3           | 64.6                |
| 1                          | HPV tests                | 11%                                      | Majority agreed      | 857.2           | 94.3                |
| 1                          | Ultrasound               | 6%                                       | Majority agreed      | 799.0           | 47.9                |
| 1                          | HIV test                 | 15%                                      | All agreed           | 47.8            | 7.2                 |
| 1                          | LLETZ                    | 40%                                      | Majority agreed      | 2 425.9         | 970.4               |
| 1                          | Pregnancy test           | 5%                                       | All agreed           | 73.5            | 3.7                 |
| 1                          | Chest X ray              | 3%                                       | Majority agreed      | 197.0           | 5.9                 |
| <b>Total weighted cost</b> |                          |                                          | <b>ZAR 1 656</b>     |                 |                     |

HPV, human papillomavirus; HIV, human immunodeficiency ; LLETZ, large loop excision of the transformation zone; Pap, Papanicolaou smear test; ZAR, South African Rand.

**Supplementary Table 5: Resource use and cost items for CIN1**

| Number of times consumed                                                   | Resource                                           | Proportion of patients receiving service | Delphi panel results | Unit cost (ZAR) | Weighted cost (ZAR) |
|----------------------------------------------------------------------------|----------------------------------------------------|------------------------------------------|----------------------|-----------------|---------------------|
| <b>Medical management of histology confirmed CIN1: physician visit</b>     |                                                    |                                          |                      |                 |                     |
| 1.4                                                                        | GP visits per patient                              | 34%                                      | Majority agreed      | 79              | 37.6                |
| 1.2                                                                        | Gynaecologist visits per patient                   | 44%                                      | Majority agreed      | 183             | 96.6                |
| 1                                                                          | Other (Infectious disease specialist)              | 17%                                      | All Agreed           | 183             | 31.1                |
| 1                                                                          | Other (oncology)                                   | 5%                                       | Majority agreed      | 183             | 9.2                 |
| 1.4                                                                        | Pap smear                                          | 72%                                      | Majority agreed      | 183             | 184.5               |
| 0                                                                          | Days in hospital (in-patient, normal room)         | 0%                                       | Majority agreed      | 1 384           | 0.0                 |
| 0                                                                          | Days in hospital (in-patient, intensive care unit) | 0%                                       | All agreed           | 3 499           | 0.0                 |
| 0.2                                                                        | Days in hospital (day care)                        | 2%                                       | Majority agreed      | 884             | 3.5                 |
| <b>Total weighted cost</b>                                                 |                                                    |                                          | <b>ZAR 362.5</b>     |                 |                     |
| <b>Medical management of histology confirmed CIN1: treatment procedure</b> |                                                    |                                          |                      |                 |                     |
|                                                                            | No treatment procedure                             | 85%                                      | Estimated average    | 0               | 0.0                 |
| 1                                                                          | Laser treatment                                    | 4%                                       | Estimated average    | 2 425.88        | 84.9                |
| 1                                                                          | Cryotherapy                                        | 1%                                       | Estimated average    | 1 412.27        | 14.1                |
| 1                                                                          | Conisation                                         | 17%                                      | Estimated average    | 532.75          | 90.6                |
| 1                                                                          | Hysterectomy                                       | 2%                                       | Estimated average    | 10 140.53       | 152.1               |
| 1                                                                          | Other (Repeat Pap smear)                           | 100%                                     | Majority agreed      | 125.29          | 125.3               |
| <b>Total weighted cost</b>                                                 |                                                    |                                          | <b>ZAR 467.0</b>     |                 |                     |
| <b>Total for CIN1</b>                                                      |                                                    |                                          | <b>ZAR 830</b>       |                 |                     |

CIN1, cervical intraepithelial grade 1; GP, general practitioner; Pap smear, Papanicolaou smear test; ZAR, South African Rand.

**Supplementary Table 6: Resource use and cost items for CIN2/3**

| Number of times consumed                                                  | Resource                              | Proportion of patients receiving service | Delphi panel results | Unit cost (ZAR) | Weighted cost (ZAR) |
|---------------------------------------------------------------------------|---------------------------------------|------------------------------------------|----------------------|-----------------|---------------------|
| <b>Medical management of histology confirmed CIN2/3: Physician visits</b> |                                       |                                          |                      |                 |                     |
| 1.4                                                                       | GP visits per patient                 | 21%                                      | Majority agreed      | 79              | 23.2                |
| 2.2                                                                       | Gynaecologist visits per patient      | 56%                                      | Majority agreed      | 183             | 225.5               |
| 1                                                                         | Other (Infectious disease specialist) | 21.20%                                   | All agreed           | 183             | 38.8                |
| 1                                                                         | Other (oncologist)                    | 5%                                       | All agreed           | 183             | 9.2                 |
| 1                                                                         | Other (HIV physician)                 | 11%                                      | Majority agreed      | 183             | 20.1                |
| 1.6                                                                       | Pap smear per patient                 | 65%                                      | All agreed           | 183             | 190.3               |

|                                                                              |                                                    |     |                    |           |       |
|------------------------------------------------------------------------------|----------------------------------------------------|-----|--------------------|-----------|-------|
| 1.4                                                                          | Days in hospital (in-patient, normal room)         | 0%  | Majority agreed    | 125.29    | 0.0   |
| 0                                                                            | Days in hospital (in-patient, intensive care unit) | 0%  | All agreed         | 3499      | 0.0   |
| 0.27                                                                         | Number of days in hospital (day care)              | 26% | Estimated average  | 884       | 60.5  |
| <b>Total weighted cost</b>                                                   |                                                    |     | <b>ZAR 567.6</b>   |           |       |
| <b>Medical management of histology confirmed CIN2/3: treatment procedure</b> |                                                    |     |                    |           |       |
|                                                                              | None                                               | 12% | Majority agreed    | 0         | 0.0   |
| 0                                                                            | Laser treatment                                    | 0%  | Majority agreed    | 2 425.88  | 0.0   |
| 1                                                                            | Cryotherapy                                        | 18% | Majority agreed    | 1 412.27  | 254.2 |
| 1                                                                            | Conisation                                         | 66% | Majority agreed    | 1 412.27  | 932.1 |
| 1                                                                            | Hysterectomy                                       | 7%  | All agreed         | 10 140.53 | 709.8 |
| <b>Total weighted cost</b>                                                   |                                                    |     | <b>ZAR 1 896.1</b> |           |       |
| <b>Total for CIN2/3</b>                                                      |                                                    |     | <b>ZAR 2 464</b>   |           |       |

CIN2/3, cervical intraepithelial grade 2/3; GP, general practitioner; HIV, human immunodeficiency; Pap smear, Papanicolaou smear test; ZAR, South African Rand.

### Supplementary Table 7: Resource use and cost items for cervical cancer

| Number of times consumed                                                              | Resource                                           | Proportion of patients receiving service | Delphi panel results | Unit cost (ZAR) | Weighted cost (ZAR) |
|---------------------------------------------------------------------------------------|----------------------------------------------------|------------------------------------------|----------------------|-----------------|---------------------|
| <b>Medical management of histology confirmed Cervical Cancer: Physician visits</b>    |                                                    |                                          |                      |                 |                     |
| 3                                                                                     | GP visits per patient                              | 59%                                      | All agreed           | 79              | 139.8               |
| 3                                                                                     | Gynaecologist visits per patient                   | 70%                                      | Majority agreed      | 183             | 384.3               |
| 4                                                                                     | Oncologist visits per patient                      | 54%                                      | Majority agreed      | 183             | 395.3               |
| 2                                                                                     | Infectious disease specialist                      | 22%                                      | All agreed           | 183             | 80.5                |
| 4                                                                                     | Psychologist / care worker                         | 45%                                      | Majority agreed      | 183             | 329.4               |
| 1                                                                                     | HIV physician                                      | 2%                                       | Majority agreed      | 183             | 3.7                 |
| 1                                                                                     | Anaesthetist visits per patient                    | 10%                                      | Majority agreed      | 1 520           | 152.0               |
| 2                                                                                     | Radiologist visits per patient                     | 27%                                      | Majority agreed      | 183             | 98.8                |
| 1                                                                                     | Pap smears per patient                             | 55%                                      | Majority agreed      | 125.29          | 68.9                |
| <b>Total weighted cost</b>                                                            |                                                    |                                          | <b>ZAR 1 653</b>     |                 |                     |
| <b>Medical management of histology confirmed cervical cancer: hospitalisation</b>     |                                                    |                                          |                      |                 |                     |
| 7                                                                                     | Days in hospital (in-patient, normal room)         | 27%                                      | All agreed           | 1 384           | 2 615.76            |
| 2                                                                                     | Days in hospital (in-patient, intensive care unit) | 5%                                       | Majority agreed      | 3 499           | 349.9               |
| 1                                                                                     | Days in hospital (day care)                        | 25%                                      | Majority agreed      | 884             | 221                 |
| <b>Total weighted cost</b>                                                            |                                                    |                                          | <b>ZAR 3 186.7</b>   |                 |                     |
| <b>Medical management of histology confirmed cervical cancer: treatment procedure</b> |                                                    |                                          |                      |                 |                     |
|                                                                                       | No treatment procedure                             | 3%                                       | All agreed           | 0               | 0.0                 |
| 0                                                                                     | Laser treatment                                    | 0%                                       | All agreed           | 2 425.88        | 0.0                 |
| 0                                                                                     | Cryotherapy                                        | 0%                                       | All agreed           | 1 412.27        | 0.0                 |
| 1                                                                                     | Conisation                                         | 8%                                       | Majority agreed      | 532.75          | 42.6                |
|                                                                                       | Hysterectomy                                       | 22%                                      | All agreed           | 10 140.53       | 2 230.9             |
|                                                                                       | Radiotherapy                                       | 75%                                      | All agreed           |                 |                     |
|                                                                                       | 25 sessions external beam                          | 75%                                      |                      | 40 110.0        | 30 082.5            |
|                                                                                       | 5 sessions brachytherapy                           |                                          |                      |                 | 0.0                 |
|                                                                                       | Chemotherapy - 5 cycles platinum                   | 30%                                      | Estimated average    | 9 675.0         | 2902.5              |
|                                                                                       | Brickers urinary diversion                         | 3%                                       | Majority agreed      | 8 174.0         | 204.4               |
|                                                                                       | Colostomy for rectovaginal fistulae                | 3%                                       | Majority agreed      | 8 174.0         | 204.4               |
| <b>Total weighted cost</b>                                                            |                                                    |                                          | <b>ZAR 35 667.3</b>  |                 |                     |
| <b>Total for cervical cancer</b>                                                      |                                                    |                                          | <b>ZAR 40 507</b>    |                 |                     |

GP, general practitioner; HIV, human immunodeficiency virus ; Pap smear, Papanicolaou smear test; ZAR, South African Rand.

## References

1. **Medicines and related substances act (101 of 1965) regulations relating to a transparent pricing system for medicines and scheduled substances: Publication of the guidelines for pharmaco-economic submissions**  
[http://www.medisacor.net/docs/GG/Medicines%20and%20related%20Substances%20Act%20101-1965%20-%20Regulations%20relating%20to%20a%20transparent%20\(20130201-GGR-36118-00068\).pdf](http://www.medisacor.net/docs/GG/Medicines%20and%20related%20Substances%20Act%20101-1965%20-%20Regulations%20relating%20to%20a%20transparent%20(20130201-GGR-36118-00068).pdf).
2. Department of Health, Republic of South Africa: **Uniform Patient Fee Schedule**  
<http://www.health.gov.za/index.php/shortcodes/2015-03-29-10-42-47/2015-04-30-09-10-23/uniform-patient-fee-schedule>.
3. **National Health Laboratory Service 2013** <http://www.health.gov.za/docs/programmes/2014/NHLS-StatePriceList2013ANNEXURE-M.pdf>.
4. Goldie SJ, Kohli M, Grima D, Weinstein MC, Wright TC, Bosch FX, Franco E: **Projected clinical benefits and cost-effectiveness of a human papillomavirus 16/18 vaccine.** *J Natl Cancer Inst* 2004, **96**:604-615.
5. **South Africa Consumer Price Index (2008 - 2012)**  
[http://www.statssa.gov.za/publications/P0141/CPIHistory.pdf?](http://www.statssa.gov.za/publications/P0141/CPIHistory.pdf)
6. International Monetary Fund: **World economic outlook database**  
<http://www.imf.org/external/pubs/ft/weo/2013/01/weodata/index.aspx>. Accessed: 9 May 2013

Delphi panel questionnaire  
Health economic research project

# Medical Management of HPV related disease

Dear Doctor,

Thank you for accepting to participate to our Delphi panel aiming at determining the medical management of patients with HPV related disease.

As you know, Cervarix<sup>®</sup>, a bivalent HPV vaccine, is to be available soon in South Africa. As part of the pricing and reimbursement submission for Cervarix<sup>®</sup>, a health economic analysis from the perspective of the South African health care system is to be provided to the authorities. The aim of such analysis is to determine the cost-effectiveness of introducing HPV vaccination compared to the current practice (screening) or between the two existing vaccines.

Given the delay between the expected age at vaccination (i.e. 12 years) and the age at which the expected benefit will be seen, such analysis is to be based on modelling. To populate the model data from different sources will be used. Data on effectiveness will be derived from clinical trials. The costs for all medical management used in the model i.e., cervical cancer screening, cervical dysplasia (CIN) treatment, warts treatment and cervical cancer treatment will be determined based on your input.

Therefore the analysis of resources used will be determined from expert opinion (two-round Delphi panel) based on the results of the current questionnaire to be independently filled in by a panel of 8 South African experts in charge of these patients in South Africa in a first round. The responses provided will thereafter be analysed (determination of average value) and presented to all of you for consolidation in a second and final round. The results on the final estimates will thereafter be included in the economic model.

This questionnaire is divided into 4 sections:

- Section 1 relates to the description of your specific expertise
- Section 2 deals with the description of the medical management of patients undergoing a cervical cancer screening in South Africa.
- Section 3 deals with the description of the medical management for CIN1, CIN2 and CIN3 and cervical cancer treatment
- Section 4 deals with the description of the medical management for genital warts treatment

Symptoms and hence medical management is likely to vary both within patients and between patients for each of the treatments investigated. For each, please try to consider all your patients (**helicopter view**) in the investigated situation (and not the individual patient). The management in this patient cohort may be considered to reflect different patient characteristics within each treatment pattern. We therefore ask you to estimate, in each section, the proportion of this patient cohort receiving each of the treatment options discussed.

**For example**, in Table 1 relating to the management of abnormal pap smears could be filled in as follows (**hypothetical numbers**):

| Diagnostic procedure following a positive pap smear | % of patients to whom this applies |
|-----------------------------------------------------|------------------------------------|
| No additional procedure                             | <b>5%</b>                          |
| <b>1.5:</b> average number of Colposcopies          | <b>20%</b>                         |
| 1: average number of Colposcopies with biopsy       | <b>2.5%</b>                        |
| <b>2.5:</b> average number of repeat pap smears     | <b>100%</b>                        |
| 1: average number of HPV tests                      | <b>10%</b>                         |
| 1: Other, please specify: <b>thorax radiography</b> | <b>0.5%</b>                        |
| .....: Other, please specify .....                  | ....%                              |



## Section One: Expert Information

Please fill in hereunder some details about your area of expertise:

**Name:**

.....

**Field of expertise:**

.....

.....

### Medical practice

Please report in the table hereunder the number of patients attending your medical practice over a one year period for each reason:

|                                                               | Number of patients seen per year           |
|---------------------------------------------------------------|--------------------------------------------|
| Cervical cancer screening                                     | ..... patients per year                    |
| Treatment of CIN1                                             | ..... patients per year                    |
| Treatment of CIN2                                             | ..... patients per year                    |
| Treatment of CIN3                                             | ..... patients per year                    |
| Treatment of cervical cancer                                  | ..... patients per year                    |
| Treatment of genital warts                                    | ..... men per year<br>..... women per year |
| Number of patients treated with genital Chlamydia trachomatis | ..... men per year<br>..... women per year |
| Total number of patients in your practice                     | ..... patients per year                    |
| Region covered by your practice                               | ..... (name of region)                     |
| Population of the region                                      | ..... number of people                     |

## Section Two: Cervical cancer screening

The following section of the questionnaire refers to your current medical management of a patient with a positive PAP smear test. Please report hereunder all **diagnostic procedures** undergone by a patient following a positive pap smear (abnormal pap), as well as the proportion of patients to which each applies (please note that the sum of % can be higher than 100% due to multiple therapies):

**Table 1: Medical management of a positive PAP smear**

| Diagnostic procedure following a positive pap smear | % of patients to whom this applies |
|-----------------------------------------------------|------------------------------------|
| No additional procedure                             | .....%                             |
| .....: average number of Colposcopies               | .....%                             |
| .....: average number of Colposcopies with biopsy   | .....%                             |
| .....: average number of repeat pap smears          | .....%                             |
| .....: average number of HPV tests                  | .....%                             |
| .....: Other, please specify .....                  | .....%                             |
| .....: Other, please specify .....                  | .....%                             |

### **Section Three: CIN & cancer treatment**

The following section of the questionnaire refers to medical management of patients following CIN1, CIN2, CIN3 or cervical cancer histology confirmed diagnosis. Please report hereunder, for each specific diagnostic (CIN1, CIN2 and CIN3), the average number of **physician visits** per year, the average number of **Pap smears per year**, all and number of **therapeutic procedures** undergone and the proportion of patients to which each applies (the sum of % can be higher than 100% due to multiple therapy and physician visits).

**Table 2: Medical management of histology confirmed CIN1**

|                             | Resource use among all CIN1 patients                                         | % of patients to whom this applies |
|-----------------------------|------------------------------------------------------------------------------|------------------------------------|
| <b>Physician visits</b>     |                                                                              |                                    |
| .....                       | Average number of GP visits per patient                                      | .....%                             |
| .....                       | Average number of gynaecologist visits per patient                           | .....%                             |
| .....                       | Average number of other specialist visits per patient<br>Please specify..... | .....%                             |
| .....                       | Average number of pap smears per patient                                     | .....%                             |
| .....                       | Average number of days in hospital (in-patient, <b>normal room</b> )         | .....%                             |
| .....                       | Average number of days in hospital (in-patient, <b>intensive care unit</b> ) | .....%                             |
| .....                       | Average number of days in hospital ( <b>day care</b> )                       | .....%                             |
| <b>Treatment procedures</b> |                                                                              |                                    |
|                             | None                                                                         | .....%                             |
| .....                       | Laser treatment                                                              | .....%                             |
| .....                       | Cryotherapy                                                                  | .....%                             |
| .....                       | Conisation                                                                   | .....%                             |
| .....                       | Hysterectomy                                                                 | .....%                             |
| .....                       | Other, please specify .....                                                  | .....%                             |
| .....                       | Other, please specify .....                                                  | .....%                             |

**Table 3: Medical management of histology confirmed CIN2/3**

|                                                                                     | Resource use among all CIN2/3 patients | % of patients to whom this applies |
|-------------------------------------------------------------------------------------|----------------------------------------|------------------------------------|
| <b>Physician visits</b>                                                             |                                        |                                    |
| .....: Average number of GP visits per patient                                      | .....%                                 |                                    |
| .....: Average number of gynaecologist visits per patient                           | .....%                                 |                                    |
| .....: Average number of other specialist visits per patient<br>Please specify..... | .....%                                 |                                    |
| .....: Average number of pap smears per patient                                     | .....%                                 |                                    |
| .....: Average number of days in hospital (in-patient, <b>normal room</b> )         | .....%                                 |                                    |
| .....: Average number of days in hospital (in-patient, <b>intensive care unit</b> ) | .....%                                 |                                    |
| .....: Average number of days in hospital ( <b>day care</b> )                       | .....%                                 |                                    |
| <b>Treatment procedures</b>                                                         |                                        |                                    |
| .....: None                                                                         | .....%                                 |                                    |
| .....: Laser treatment                                                              | .....%                                 |                                    |
| .....: Cryotherapy                                                                  | .....%                                 |                                    |
| .....: Conisation                                                                   | .....%                                 |                                    |
| .....: Hysterectomy                                                                 | .....%                                 |                                    |
| .....: Other, please specify .....                                                  | .....%                                 |                                    |
| .....: Other, please specify .....                                                  | .....%                                 |                                    |

**Table 4: Medical management of histology confirmed cervical cancer**

|                                                                                      | Resource use among all Cervical Cancer patients | % of patients to whom this applies |
|--------------------------------------------------------------------------------------|-------------------------------------------------|------------------------------------|
| <b>Physician visits</b>                                                              |                                                 |                                    |
| .....: Average number of GP visits per patient                                       | .....%                                          |                                    |
| .....: Average number of gynaecologist visits per patient                            | .....%                                          |                                    |
| .....: Average number of oncologist visits per patient                               | .....%                                          |                                    |
| .....: Average number of other specialist visits per patient<br>Please specify ..... | .....%                                          |                                    |
| .....: Average number of other specialist visits per patient<br>Please specify.....  | .....%                                          |                                    |
| .....: Average number of other specialist visits per patient<br>Please specify.....  | .....%                                          |                                    |
| .....: Average number of other specialist visits per patient<br>Please specify.....  | .....%                                          |                                    |
| .....: Average number of pap smears per patient                                      | .....%                                          |                                    |
| <b>Hospitalisations</b>                                                              |                                                 |                                    |
| .....: Average number of days in hospital (in-patient, <i>normal room</i> )          | .....%                                          |                                    |
| .....: Average number of days in hospital (in-patient, <i>intensive care unit</i> )  | .....%                                          |                                    |
| .....: Average number of days in hospital ( <i>day care</i> )                        | .....%                                          |                                    |

**Table 4: Medical management of histology confirmed cervical cancer (continued)**

|                             | Resource use among all Cervical Cancer patients                                    | % of patients to whom this applies |
|-----------------------------|------------------------------------------------------------------------------------|------------------------------------|
| <b>Treatment procedures</b> |                                                                                    |                                    |
|                             | .....: None                                                                        | .....%                             |
|                             | .....: Laser treatment                                                             | .....%                             |
|                             | .....: Cryotherapy                                                                 | .....%                             |
|                             | .....: Conisation                                                                  | .....%                             |
|                             | Hysterectomy                                                                       | .....%                             |
|                             | Radiotherapy<br>specify (dosage and number of sessions)<br>.....<br>.....<br>..... | .....%                             |
|                             | Chemotherapy<br>Specify regimen and number of cycles<br>.....<br>.....<br>.....    | .....%                             |
|                             | .....: Other, please specify .....                                                 | .....%                             |
|                             | .....: Other, please specify .....                                                 | .....%                             |
|                             | .....: Other, please specify .....                                                 | .....%                             |
|                             | .....: Other, please specify .....                                                 | .....%                             |

## Section Four: Treatment of Genital warts

This section of the questionnaire refers to the medical management of patients with genital warts. Please report hereunder for all your patients with genital warts over a one year period, the average number of **physician visits**, all **pharmacological treatments** received and all **therapeutic procedures** undergone as well as the proportion of patients to which each applies, and, for the therapeutic procedures. Please note that the sum of % can be higher than 100% due to multiple treatment and physician visits.

**Table 5: Medical management of women with genital warts (treatment and follow-up)**

| Resource use among all genital warts patients                                                  | % of patients to whom this applies |
|------------------------------------------------------------------------------------------------|------------------------------------|
| <b>Physician visits</b>                                                                        |                                    |
| .....: Average number of GP visits per patient per year                                        | .....%                             |
| .....: Average number of gynaecologist visits per patient per year                             | .....%                             |
| .....: Average number of dermatologist visits per patient per year                             | .....%                             |
| .....: Average number of other visits per patient per year; please specify .....               | .....%                             |
| <b>Pharmacological treatment</b>                                                               |                                    |
| Imiquimod<br>Dose per day .....<br>..... average number of days per year                       | .....%                             |
| Podophylotoxine<br>Dose per day .....<br>..... average number of days per year                 | .....%                             |
| Other, please specify:<br>.....<br>Dose per day .....<br>..... average number of days per year | .....%                             |
| Other, please specify:<br>.....<br>Dose per day .....<br>..... average number of days per year | .....%                             |
| <b>Treatment procedures</b>                                                                    |                                    |
| .....: Average number of procedures in patients undergoing electrocoagulation                  | .....%                             |
| .....: Average number of procedures in patients undergoing laser treatment                     | .....%                             |
| .....: Average number of procedures in patients undergoing cryotherapy                         | .....%                             |
| .....: Average number of procedures in patients undergoing Surgical excision                   | .....%                             |
| .....: Average number of other procedures, please specify.....                                 | .....%                             |
| .....: Average number of other procedures, please specify.....                                 | .....%                             |



**THANK YOU FOR YOUR INPUT!!**
