# Supplementary material for: Cost-effectiveness analysis of human papillomavirus vaccination in South Africa accounting for human immunodeficiency virus prevalence
Source: Springer Nature journal article supplement (doi:10.1186/s12879-015-1295-z), 2015-12-01
Supplement: MOESM3 [file 9740588]

### Additional file 3 – Input ranges for one way sensitivity analyses

| Parameter                        | Base value  | Minimum     | Maximum     |
|----------------------------------|-------------|-------------|-------------|
| Oncogenic HPV incidence in women | 0.041–0.390 | 0.033–0.312 | 0.050–0.467 |
| HIV incidence rate               | 0.005–0.057 | 0.004–0.046 | 0.006–0.068 |
| Mortality rate                   |             |             |             |
| HIV-                             | 0.001–0.182 | 0.001–0.146 | 0.001–0.218 |
| HIV+                             | 0.002–0.273 | 0.002–0.218 | 0.002–0.328 |
| Disutility                       |             |             |             |
| CIN1                             | 0.0128      | 0.0102      | 0.0154      |
| CIN2/3                           | 0.0127      | 0.0102      | 0.0152      |
| Cervical cancer                  | 0.2730      | 0.2184      | 0.3276      |
| Cervical cancer cured            | 0.062       | 0.496       | 0.0744      |
| Baseline HIV+ utility            | 0.810       | 0.648       | 0.972       |
| Screening coverage (%)           | 13.6        | 10.9        | 16.3        |
| Screening start age (years)      | 30          | 24          | 36          |
| Screening end age (years)        | 60          | 48          | 72          |
| Screening interval (years)       | 3           | 2           | 4           |
| Sensitivity pap screening        |             |             |             |
| CIN1                             | 0.580       | 0.464       | 0.696       |
| CIN2/3                           | 0.610       | 0.488       | 0.732       |
| Cost screening (ZAR)             | 256.00      | 205.00      | 307.00      |
| Cost treatment (ZAR)             |             |             |             |
| CIN1                             | 830.00      | 664.00      | 996.00      |
| CIN2/3                           | 2 464.00    | 1 971.00    | 2 957.00    |
| Cervical cancer                  | 40 507.00   | 32 406.00   | 48 608.00   |
| Vaccine efficacy (%) [1]         |             |             |             |
| CIN1                             | 50.3        | 40.2        | 58.8        |
| CIN2/3                           | 64.9        | 52.7        | 74.2        |
| Cervical cancer                  | 93.2        | 78.9        | 98.7        |

CIN, cervical intraepithelial neoplasia; CIN1, cervical intraepithelial neoplasia grade 1; CIN2/3, cervical intraepithelial neoplasia grade 2 or 3; HIV+, human immunodeficiency virus positive; HIV-, human immunodeficiency virus negative; HPV, human papillomavirus; ZAR, South African Rand.

1. Lehtinen M, Paavonen J, Wheeler CM, Jaisamrarn U, Garland SM, Castellsague X, Skinner SR, Apter D, Naud P, Salmeron J, Chow SN, Kitchener H, Teixeira JC, Hedrick J, Limson G, Szarewski A, Romanowski B, Aoki FY, Schwarz TF, Poppe WA, De Carvalho NS, Germar MJ, Peters K, Mindel A, De SP, Bosch FX, David MP, Descamps D, Struyf F, Dubin G: **Overall efficacy of HPV-16/18 AS04-adjuvanted vaccine against grade 3 or greater cervical intraepithelial neoplasia: 4-year end-of-study analysis of the randomised, double-blind PATRICIA trial.** *Lancet Oncol* 2012, **13**:89-99.

*This is confidential information of the GSK group of companies. This document is only for review and should not be shared further. Premature disclosure of unpublished or unrepresented material can result in refusal of publications by journals and congresses.*
