# Supplementary material for: Cost-effectiveness analysis of human papillomavirus vaccination in South Africa accounting for human immunodeficiency virus prevalence
Source: Springer Nature journal article supplement (doi:10.1186/s12879-015-1295-z), 2015-12-01
Supplement: MOESM4 [file 9740588]

## Additional File 4 - Multivariate probabilistic sensitivity analysis input data

| Variable names                                  | Distribution                        | Distribution parameters |                                         |
|-------------------------------------------------|-------------------------------------|-------------------------|-----------------------------------------|
|                                                 |                                     | HIV- subpopulation      | HIV+ subpopulation                      |
| <b>Transition probability</b>                   |                                     |                         |                                         |
| HPV-Onc to CIN1                                 | Normal distribution between 0 and 1 | 0.049(SD. 0.009) [1]    | 0.096 (0.007) [2]                       |
| HPV-Onc clearance to normal                     | Uniform distribution                | 0.234-0.664 [1,3-5]     | 0.170-0.254 [2]                         |
| CIN1 to CIN2/3                                  | Normal distribution between 0 and 1 | 0.091 (SD.0.021) [4-6]  | 0.098 (SD.0.013) [2]                    |
| CIN2/3 cured                                    | Normal distribution between 0 and 1 | 0.227 (SD.0.058) [4-6]  | Assumption (same as HIV- subpopulation) |
| CIN2/3 to persistent CIN2/3                     | Uniform distribution                | 0.091-0.137 [5,6]       | Assumption (same as HIV- subpopulation) |
| Persistent CIN2/3 to cervical cancer            | Uniform distribution                | 0-0.098                 | 0-0.181 [7]                             |
| <b>Mortality rate</b>                           |                                     |                         |                                         |
| Age-dependent mortality data                    | Uniform distribution                | 0.001-0.064 [8]         | 0.001-0.449 [8]                         |
| <b>HPV and HIV incidence</b>                    |                                     |                         |                                         |
| HIV incidence rate in women                     | Uniform distribution                | N/A                     | 0.001-0.036 [8]                         |
| Oncogenic HPV incidence                         | Uniform distribution                | 0.033-0.468 [9]         | 0.088-1 [9] [10]                        |
| <b>Cervical cancer parameters</b>               |                                     |                         |                                         |
| Cervical cancer mortality                       | Uniform distribution                | 0.088-0.132 [11]        | 0.233-0.349 [12]                        |
| Cervical cancer cured                           | Uniform distribution                | 0.121-0.181 [11]        | 0.022-0.033 [12]                        |
| <b>HPV screening-related parameters</b>         |                                     |                         |                                         |
| CIN1 detected                                   | Normal distribution between 0 and 1 | 0.58 (SD.0.045) [13]    | 0.58 (SD.0.045) [13]                    |
| CIN2/3 detected                                 | Normal distribution between 0 and 1 | 0.61 (SD. 0.045) [13]   | 0.61 (SD. 0.045) [13]                   |
| <b>HPV-related disease management</b>           |                                     |                         |                                         |
| Proportion of women treated if CIN1 is detected | Uniform distribution                | 0.4-0.6 (assumption)    | Assumption (same as HIV- subpopulation) |
| CIN1 treatment success                          | Uniform distribution                | 0.72-1 (assumption)     | Assumption (same as HIV- subpopulation) |
| CIN2/3 treatment success                        | Uniform distribution                | 0.72-1 (assumption)     | Assumption (same as HIV- subpopulation) |
| <b>Vaccine efficacy [14]</b>                    |                                     |                         |                                         |
| Vaccine efficacy for CIN1+                      | Normal distribution between 0 and 1 | 0.503 (SD.0.054)        | 0.503 (SD.0.047)                        |
| Vaccine efficacy for CIN2/3                     | Normal distribution between 0 and 1 | 0.649 (SD.0.054)        | 0.649 (SD.0.054)                        |
| Vaccine efficacy for CC                         | Normal distribution between 0 and 1 | 0.932 (SD.0.050)        | 0.932 (SD.0.050)                        |
| <b>Disutility data [3,15-18]</b>                |                                     |                         |                                         |
| No HPV (baseline value)                         | Fix at 0                            | N/A                     | N/A                                     |
| HIV+ (baseline value)                           | Uniform distribution                | N/A                     | 0.648-0.972 [19]                        |
| HPV-Onc                                         | Fix at 0                            | N/A                     | N/A                                     |
| CIN1                                            | Fix at 0                            | N/A                     | N/A                                     |

| Variable names                               | Distribution         | Distribution parameters |                    |
|----------------------------------------------|----------------------|-------------------------|--------------------|
|                                              |                      | HIV- subpopulation      | HIV+ subpopulation |
| CIN1 detected                                | Uniform distribution | 0.010-0.015             | 0.010-0.015        |
| CIN2/3                                       | Fix at 1             | N/A                     | N/A                |
| CIN2/3 detected                              | Uniform distribution | 0.010-0.015             | 0.010-0.015        |
| Cervical cancer                              | Uniform distribution | 0.218-0.328             | 0.218-0.328        |
| Cervical cancer cured                        | Uniform distribution | 0.050-0.074             | 0.050-0.074        |
| <b>Cost data</b>                             |                      |                         |                    |
| Cost of regular screening negative Pap smear | Uniform distribution | ZAR 205-307             | ZAR 205-307        |
| Regular screening + false positive           | Uniform distribution | ZAR 231-347             | ZAR 231-347        |
| Treatment CIN1 detected                      | Uniform distribution | ZAR 664-996             | ZAR 664-996        |
| Treatment CIN2/3 detected                    | Uniform distribution | ZAR 1 971-2 957         | ZAR 1 971-2 957    |
| Cervical cancer stage I-IV                   | Uniform distribution | ZAR 32 406-48 608       | ZAR 32 406-48 608  |

### Abbreviations

CC, cervical cancer; CIN, cervical intraepithelial neoplasia; CIN1, CIN grade 1; CIN2/3, CIN grade 2 or 3; HPV, human papillomavirus; HPV-Onc, oncogenic HPV types; HIV, human immunodeficiency virus; HIV-, HIV-negative; HIV+, HIV+positive; Pap, Papanicolou smear test; SD, standard deviation; ZAR, South African Rand.

### References

1. Moscicki AB, Hills N, Shiboski S, Powell K, Jay N, Hanson E, Miller S, Clayton L, Farhat S, Broering J, Darragh T, Palefsky J: **Risks for incident human papillomavirus infection and low-grade squamous intraepithelial lesion development in young females.** *JAMA* 2001, **285**:2995-3002.
2. Omar T, Schwartz S, Hanrahan C, Modisenyane T, Tshabangu N, Golub JE, McIntyre JA, Gray GE, Mohapi L, Martinson NA: **Progression and regression of premalignant cervical lesions in HIV-infected women from Soweto: a prospective cohort.** *AIDS* 2011, **25**:87-94.
3. Goldie SJ, Kohli M, Grima D, Weinstein MC, Wright TC, Bosch FX, Franco E: **Projected clinical benefits and cost-effectiveness of a human papillomavirus 16/18 vaccine.** *J Natl Cancer Inst* 2004, **96**:604-615.
4. Schlecht NF, Platt RW, Duarte-Franco E, Costa MC, Sobrinho JP, Prado JC, Ferenczy A, Rohan TE, Villa LL, Franco EL: **Human papillomavirus infection and time to progression and regression of cervical intraepithelial neoplasia.** *J Natl Cancer Inst* 2003, **95**:1336-1343.
5. Melnikow J, Nuovo J, Willan AR, Chan BK, Howell LP: **Natural history of cervical squamous intraepithelial lesions: a meta-analysis.** *Obstet Gynecol* 1998, **92**:727-735.
6. Holowaty P, Miller AB, Rohan T, To T: **Natural history of dysplasia of the uterine cervix.** *J Natl Cancer Inst* 1999, **91**:252-258.

7. De Vuyst H, Lillo F, Broutet N, Smith JS: **HIV, human papillomavirus, and cervical neoplasia and cancer in the era of highly active antiretroviral therapy.** *Eur J Cancer Prev* 2008, **17**:545-554.
8. Actuarial Society of South Africa: **ASSA2008: AIDS Demographic Model 2008** <http://www.actuarialsociety.org.za/Societyactivities/CommitteeActivities/AidsCommittee/Models.aspx>. Access granted in November 2012 and confirmed in November 2015 by the Actuarial Society of South Africa, owner of the model.
9. Institut Català d'Oncologia (ICO): **Information Centre on HPV and Cancer (HPV Information Centre)** <http://www.hpvcentre.net/dataquery.php>. Accessed: 10 Feb. 2014
10. Vijayaraghavan A, Efrusy M, Lindeque G, Dreyer G, Santas C: **Cost effectiveness of high-risk HPV DNA testing for cervical cancer screening in South Africa.** *Gynecol Oncol* 2009, **112**:377-383.
11. Ferlay, J., Soerjomataram, Isabelle, Ervik, M., Dikshit, R., Eser, S., Mathers, C., Rebelo, M., Parkin, D. M., Forman, D., and Bray F.: **GLOBOCAN 2012 v1.0, Cancer incidence and mortality worldwide: IARC CancerBase No. 11 [Internet]** <http://globocan.iarc.fr>. Accessed: 31 Jan. 2014  
International Agency for Research on Cancer (IARC), Lyon, France
12. Coghill AE, Newcomb PA, Madeleine MM, Richardson BA, Mutyaba I, Okuku F, Phipps W, Wabinga H, Orem J, Casper C: **Contribution of HIV infection to mortality among cancer patients in Uganda.** *AIDS* 2013.
13. Fahey MT, Irwig L, Macaskill P: **Meta-analysis of Pap test accuracy.** *Am J Epidemiol* 1995, **141**:680-689.
14. Lehtinen M, Paavonen J, Wheeler CM, Jaisamrarn U, Garland SM, Castellsague X, Skinner SR, Apter D, Naud P, Salmeron J, Chow SN, Kitchener H, Teixeira JC, Hedrick J, Limson G, Szarewski A, Romanowski B, Aoki FY, Schwarz TF, Poppe WA, De Carvalho NS, Germar MJ, Peters K, Mindel A, De SP, Bosch FX, David MP, Descamps D, Struyf F, Dubin G: **Overall efficacy of HPV-16/18 AS04-adjuvanted vaccine against grade 3 or greater cervical intraepithelial neoplasia: 4-year end-of-study analysis of the randomised, double-blind PATRICIA trial.** *Lancet Oncol* 2012, **13**:89-99.
15. Gold MR, Franks P, McCoy KI, Fryback DG: **Toward consistency in cost-utility analyses: using national measures to create condition-specific values.** *Med Care* 1998, **36**:778-792.
16. Insinga R, Glass A, Rush B: **Health state transitions following an abnormal pap smear: implications for health utility assessment in cost-effectiveness analyses [Abstract W-02].** In *22nd International Papillomavirus Conference & Clinical Workshop 2005; 30 Apr.-06 May 2005*.
17. Myers ER, Green S, Lipkus I: **Patient preferences for health states related to HPV infection: visual analog scale versus time trade-off elicitation [Abstract n° 542].** In *Twenty-First International Papillomavirus Conference; 20-27 February 2004*.
18. Institute of Medicine (US) Committee to Study Priorities for Vaccine Development, Stratton KR DJLRe: **Appendix 11: Human Papillomavirus.** In *Vaccines for the 21st century: a tool for decisionmaking*. Edited by Edited by Stratton KR, Durch JS, Lawrence S. Washington D.C.: National Academy Press; 2000:213-221.
19. Robberstad B, Olsen JA: **The health related quality of life of people living with HIV/AIDS in sub-Saharan Africa - a literature review and focus group study.** *Cost Eff Resour Alloc* 2010, **8**:5.
